# Supplementary material for: Expression of teneurins is associated with tumor differentiation and patient survival in ovarian cancer
Source: PubMed Central journal article supplement (PMC5417686; doi:10.1371/journal.pone.0177244), 2017-05-04

**S2 Fig. Immunohistochemical Analysis of Additional Cell Lines.**

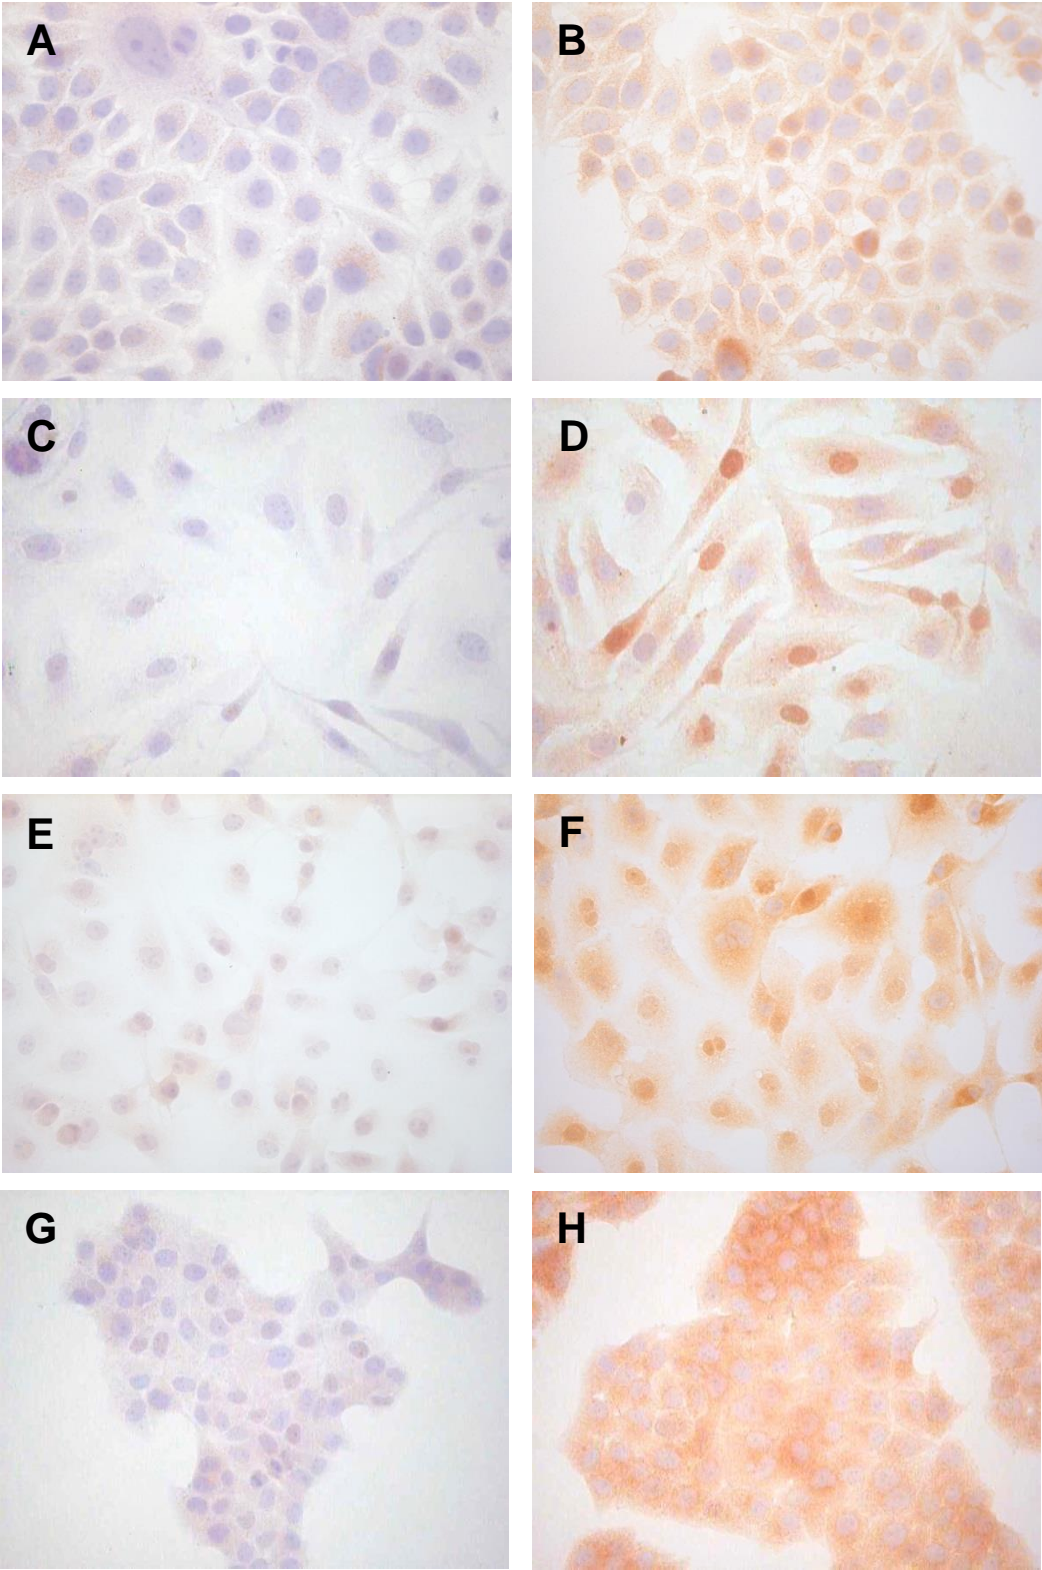

Supplement: pone.0177244.s002.pdf [file pone.0177244.s002.pdf]
