# Supplementary material for: Expression of teneurins is associated with tumor differentiation and patient survival in ovarian cancer
Source: PubMed Central journal article supplement (PMC5417686; doi:10.1371/journal.pone.0177244), 2017-05-04
Supplement: pone.0177244.s003.pdf [file pone.0177244.s003.pdf]

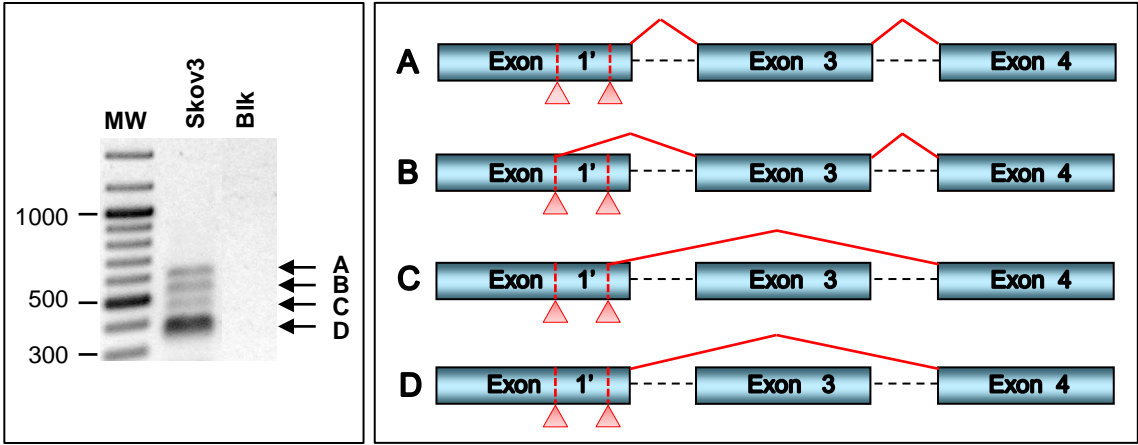

**S3 Fig. Ten-2 mRNA Splice Variants Detected in SKOV3 Ovarian Cancer Cells.**
